# Supplementary material for: Assessment of Zearalenone-Induced Cell Survival and of Global Gene Regulation in Mouse TM4 Sertoli Cells
Source: MDPI journal article supplement (doi:10.3390/toxins14020098), 2022-01-26
Supplement: s1 [file s1]

# Supplementary Materials: Assessment of Zearalenone-Induced Cell Survival and of Global Gene Regulation in Mouse TM4 Sertoli Cells

Christian Savard, Sadaf Gawhary, Alexandre Boyer and Younes Chorfi

**Table S4.** Comparison of fold-change in mRNA levels (ZEA treated vs non-treated cell) for selected genes, as determined by RNAseq and RT-qPCR.

| Gene         | RT-qPCR fold-change | RNAseq fold-change | Average reads in ZEA treated cells | Average reads in control cells |
|--------------|---------------------|--------------------|------------------------------------|--------------------------------|
| <i>Btg2</i>  | 2,45                | 2,23               | 446.6 ± 13.8                       | 199.4 ± 7.3                    |
| <i>Car8</i>  | -5,08               | -6,93              | 9.4 ± 1.1                          | 65.29 ± 3.4                    |
| <i>Ctgf</i>  | 2,25                | 2,03               | 26508 ± 538.3                      | 13050 ± 497.5                  |
| <i>Fst</i>   | -3,87               | -3,77              | 462.6 ± 12.21                      | 1745 ± 50.9                    |
| <i>Igf1</i>  | 1,48                | 5,58               | 149.8 ± 26.5                       | 14.51 ± 3.9                    |
| <i>Pgr</i>   | 5,14                | 4,34               | 216.9 ± 3.9                        | 49.53 ± 3.8                    |
| <i>Sox9</i>  | -4,11               | -3.56              | 29.1 ± 3.1                         | 103 ± 6.7                      |
| <i>Spp1</i>  | -4,15               | -4,43              | 1738 ± 53.0                        | 7691 ± 395.4                   |
| <i>Thbs2</i> | 11,22               | 8,03               | 44913 ± 1986                       | 5505 ± 584.6                   |

**Table S5.** Quantitative RT-PCR primer sequences.

| Gene         | Forward                   | Reverse                   |
|--------------|---------------------------|---------------------------|
| <i>Btg2</i>  | GTGGGTTTCCTCTCCAGTCTC     | CCAGTGGTGTTTGTAAATGATCGGT |
| <i>Car8</i>  | GATGTCCGCCTGTCTCCAAA      | TGGTCCTCCTGACAAGACTGA     |
| <i>Ctgf</i>  | GAGGAAAACATTAAGAAGGGCAAAA | CCGCAGAACTTAGCCCTGTA      |
| <i>Fst</i>   | CAAAGTCCTGTGAAGATATCCAGT  | TAGGAAAGTTGTAGTCCTGGTCT   |
| <i>Igf1</i>  | AAGGCAGTTTACCCAGGCTC      | TCTTTATTGCAGGTGCGGTCA     |
| <i>Pgr</i>   | TCCAGGTGACCCATGAGGAA      | TTGCCTTGATCAATTCGCGG      |
| <i>Rpl19</i> | CTGAAGGTCAAAGGGAATGTG     | GGACAGAGTCTTGATGATCTC     |
| <i>Sox9</i>  | TGCTGCTTCGACATCCACACGTG   | GACGTGCAAGCTGGCAAAGTTGA   |
| <i>Spp1</i>  | CCTTGCTTGGGTTTGCAGTC      | TGGTCGTAGTTAGTCCCTCAGA    |
| <i>Thbs2</i> | TGGCATCGCTGTAGGTTTCG      | TGCCACTGAAGTCCACAGAC      |
